# Supplementary material for: Reprogramming macrophages with R848-loaded artificial protocells to modulate skin and skeletal wound healing
Source: PubMed Central journal article supplement (PMC11385641; doi:10.1242/jcs.262202), 2024-08-29
Supplement: joces-137-262202-s1.pdf [file joces-137-262202-s1.pdf]

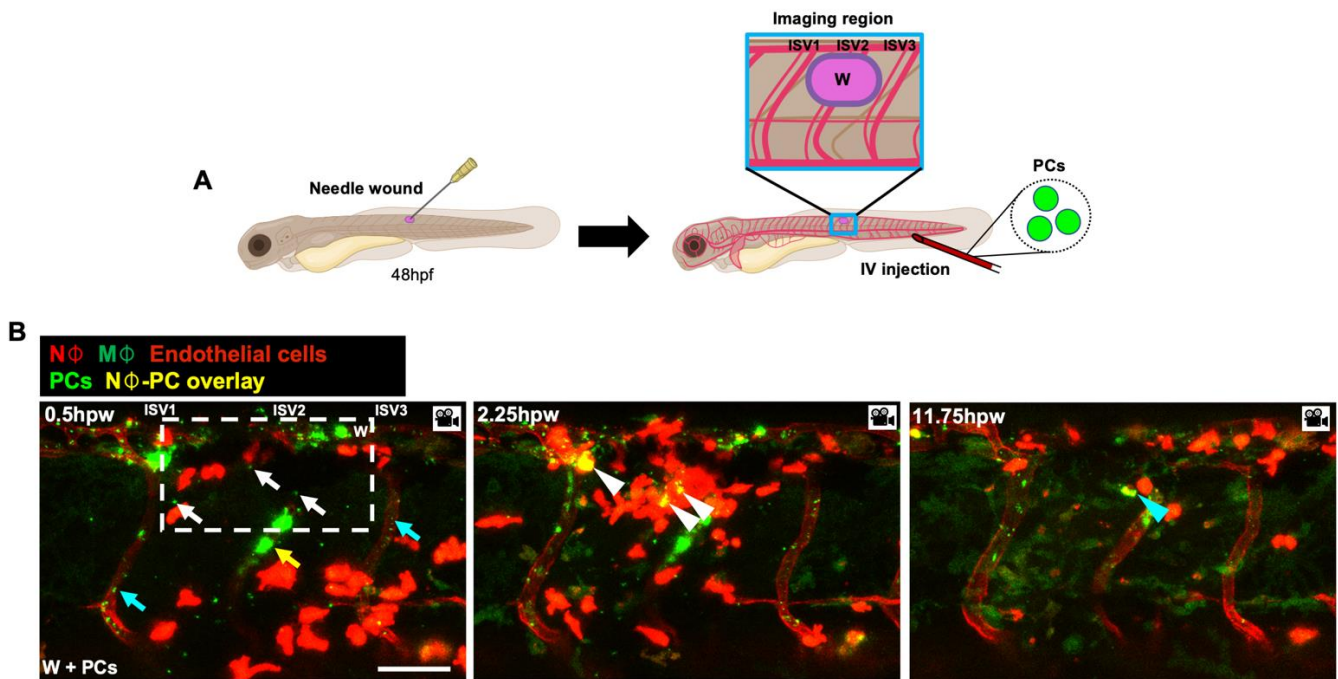

**Fig. S1. Protocells can also be taken up by wound neutrophils. (A)** Schematic for experiments in (B) showing wound, injection site and imaging regions (blue boxes). **(B)** Confocal images from a time-lapse movie of a wounded *Tg(lyz:DsRed;mpeg1:FRET;kdr1:mCherry-CAAX)* larva after injection with FITC-protocells (bright green dots), showing protocells at the wound region (white dashed box) outside vessels (dim red endothelial cells, white arrows), accumulated inside of damaged ISV2 (yellow arrow), flowing within intact ISV1,3 (cyan arrows), inside neutrophils (bright red cells, white arrowheads) or inside macrophages (dim green cells, cyan arrowhead) at 0.5, 2.25 and 11.75 hpw. ISV=intersegmental vessel; M $\Phi$ =macrophages; N $\Phi$ =neutrophils; W=wound. Scale bars=50  $\mu$ m.

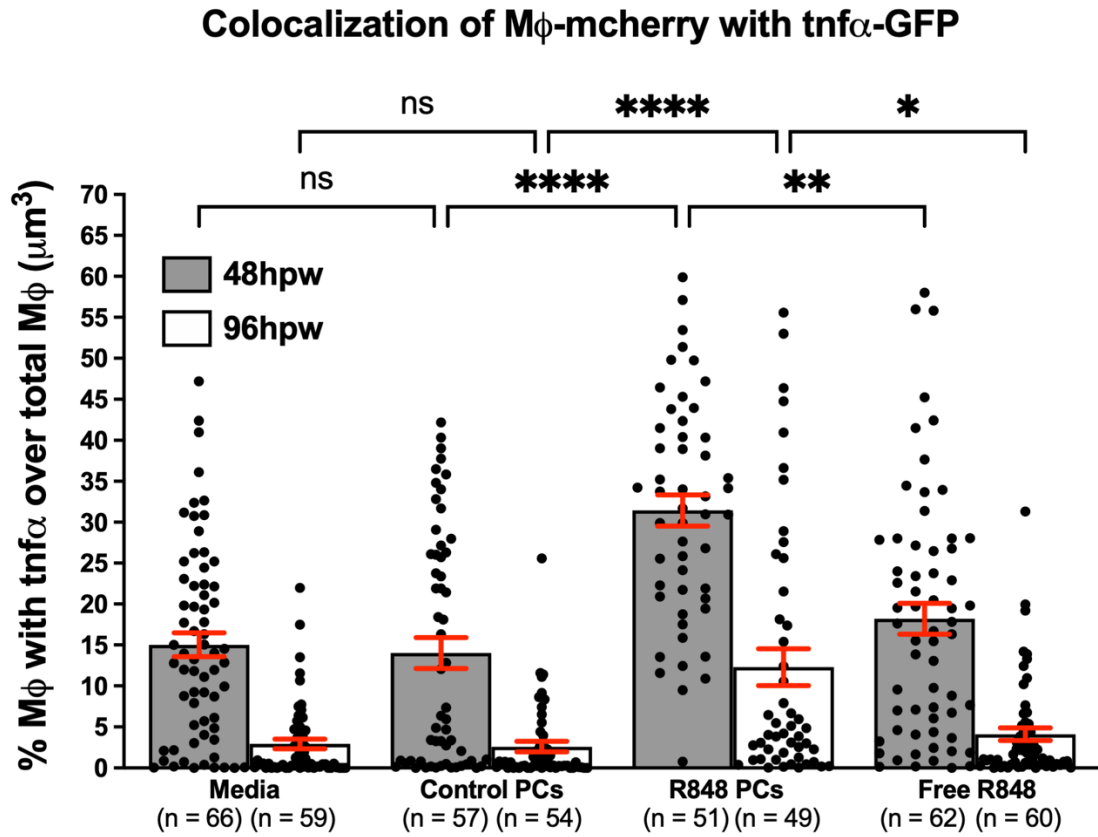

**Fig. S2. Injected R848-protocells trigger a higher tn $\alpha$  expression in larval wound macrophages than free R848.** Graph showing percentage of tn $\alpha$ -positive macrophages after each treatment. Data from “Control PCs” and “R848 PCs” are also represented in Fig. 2G. Same concentration of R848 is used in “R848 PCs” and “Free R848”. Each dot in the graph represents one fish. Error bars are mean  $\pm$  s.e.m. ns, not significant; \*P<0.05; \*\*P<0.01; \*\*\*\*P<0.0001 (Kruskal–Wallis test with Dunn’s multiple comparison post-test). M $\phi$ =macrophages; n=number of fish.

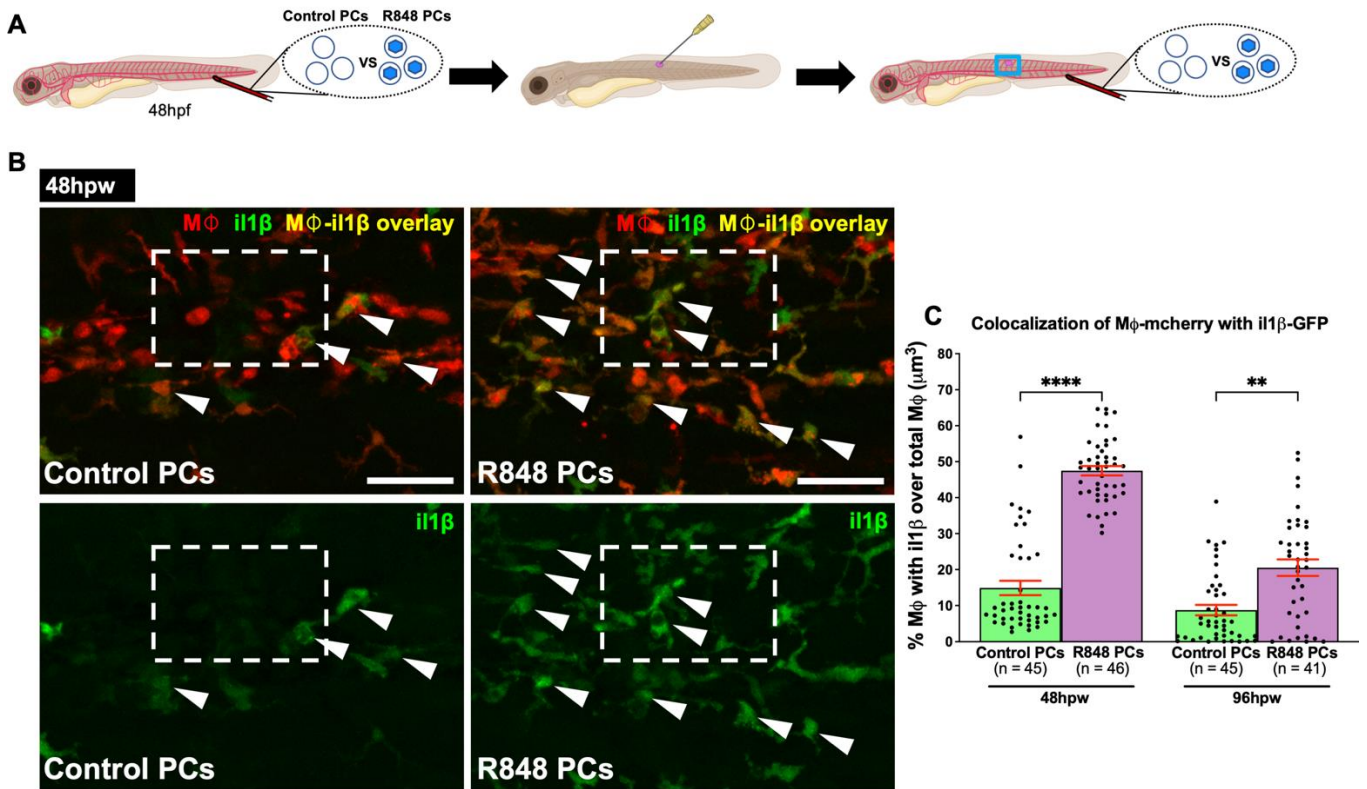

**Fig. S3. Uptake of R848-protocells enhances *il1β* expression in larval wound macrophages.** (A) Schematic for experiments in (B,C) showing wounds, injection sites and imaging region (blue box). (B) Confocal images of wounded *Tg(mpeg1:mCherry;il1β:GFP)* larvae showing *il1β*-positive macrophages (white arrowheads) after each protocell treatment. White dashed boxes indicate wound sites. (C) Graph showing percentage of *il1β*-positive macrophages. Each dot in the graph represents one fish. \*\* $P < 0.01$ ; \*\*\*\* $P < 0.0001$  (unpaired two-sided Mann-Whitney test). n=number of fish. Scale bars=50  $\mu\text{m}$ .

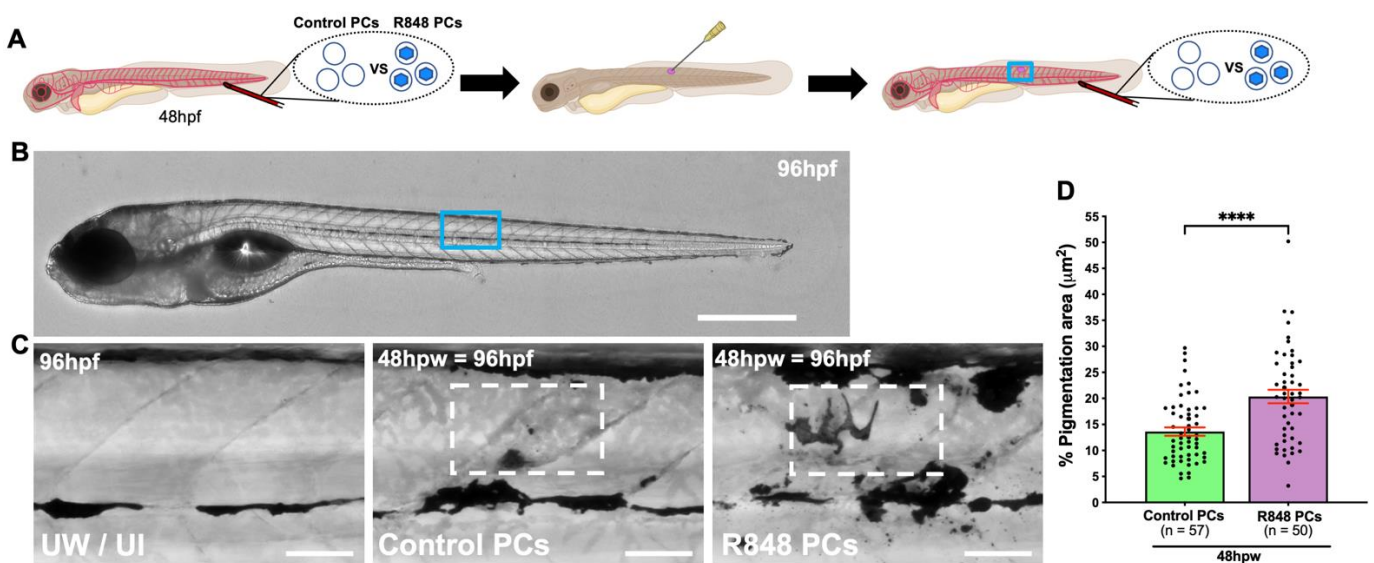

**Fig. S4. R848-protocell reprogramming of macrophages leads to hyperpigmented wounds.** (A) Schematic for experiments in (B-D) showing wounds, injection sites and imaging region (blue box). (B) Confocal image of a whole WT larva (pigmentation in black). Blue box indicates imaging region. (C) High magnification views showing unwounded/uninjected (UW/UI) or wounded larvae after each protocell treatment. White dashed boxes indicate wound sites. (D) Graph showing percentage of pigmentation area. Each dot in the graph represents one fish. \*\*\*\* $P < 0.0001$  (unpaired two-sided Mann-Whitney test). n=number of fish. Scale bars=500  $\mu\text{m}$  (B), 50  $\mu\text{m}$  (C).

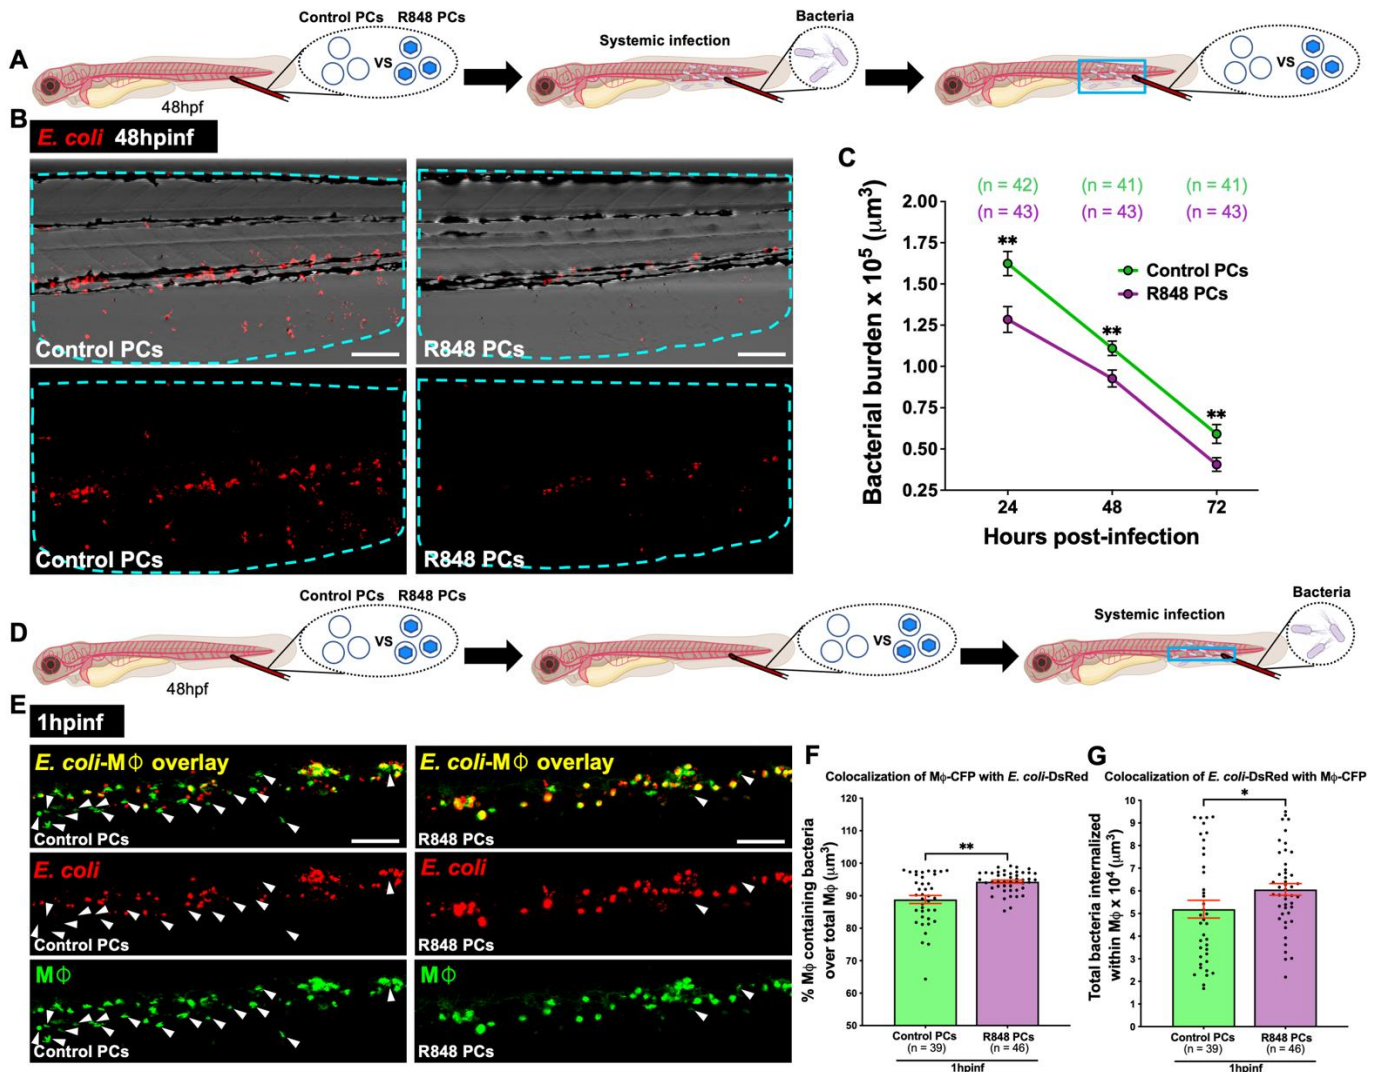

**Fig. S5. Enhanced uptake and killing of bacteria by R848-protocells-reprogrammed macrophages. (A,D)** Schematics for experiments in (B,C,E-G) showing injection sites and imaging regions (blue boxes). **(B)** Confocal images of infected WT larvae showing bacteria (red) after each protocell treatment. Cyan dashed lines indicate analyzed regions. **(C)** Graph showing bacterial burden. **(E)** Confocal images of infected *Tg(mpeg1:FRET)* larvae showing macrophages with (yellow) or without (green, white arrowheads) internalised bacteria (red) after each protocell treatment. **(F,G)** Graphs showing percentage of macrophages containing bacteria (F) or total bacteria internalized within macrophages (G). Each dot in graph (C) represents the mean of all fish analyzed, and in graphs (F,G) one fish. \* $P < 0.05$ ; \*\* $P < 0.01$  (unpaired two-sided Mann-Whitney test).  $M\phi$  = macrophages; n = number of fish. Scale bars = 100  $\mu\text{m}$ .

**Table S1. Sequence of primers for qPCR assays used in this study.** Primers were chosen from PrimerBank (Spandidos et al., 2010) unless otherwise referenced. F=forward; R=reverse.

| Gene         | Species | Primer sequence (5'-3') |                          | Source        |                         |
|--------------|---------|-------------------------|--------------------------|---------------|-------------------------|
|              |         |                         |                          | PrimerBank ID | Reference               |
| EF1 $\alpha$ | Human   | F                       | TGTCGTCATTGGACACGTAGA    |               | (Gurevich et al., 2018) |
|              |         | R                       | ACGCTCAGCTTTCAGTTTATCC   |               |                         |
| IL1 $\beta$  | Human   | F                       | ATGATGGCTTATTACAGTGGCAA  | 27894305c1    |                         |
|              |         | R                       | GTCGGAGATTCGTAGCTGGA     |               |                         |
| IL6          | Human   | F                       | AAGCCAGAGCTGTGCAGATGAGTA |               | (Shinriki et al., 2009) |
|              |         | R                       | TGTCCTGCAGCCACTGGTTC     |               |                         |
| TNF $\alpha$ | Human   | F                       | CGCTCCCCAAGAAGACAG       |               | (Gurevich et al., 2018) |
|              |         | R                       | AGAGGCTGAGGAACAAGCAC     |               |                         |
| IL10         | Human   | F                       | TCAAGGCGCATGTGAACTCC     | 24430216c2    |                         |
|              |         | R                       | GATGTCAAAC TCACTCATGGCT  |               |                         |
| MRC1         | Human   | F                       | TTCAGAAGGTTTTACTTGGAGTGA |               | (Gurevich et al., 2018) |
|              |         | R                       | TCTCCATAAGCCCAGTTTTCA    |               |                         |

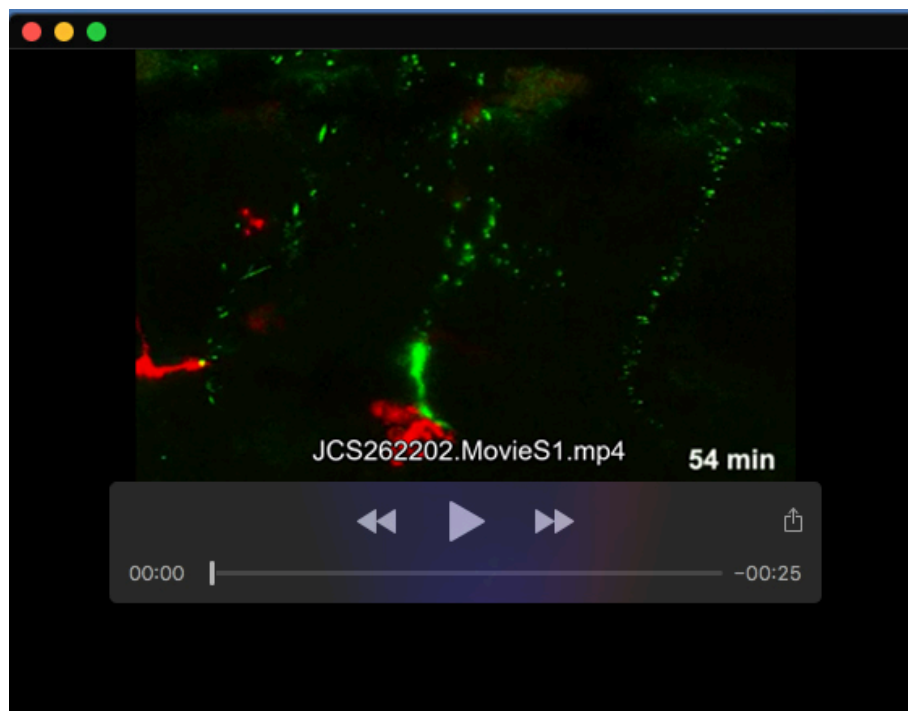

**Movie 1. Macrophages effectively taking up protocells at the wound site.** Time-lapse confocal movie showing uptake of protocells (green dots) by wound-recruited macrophages (red cells) in a wounded *Tg(mpeg1:mCherry)* larva at 0.5 hours post-wounding after systemic protocell injection. Note that macrophages can take up protocells accumulated at the damaged intersegmental vessel and those that leaked from this vessel towards the wound site.

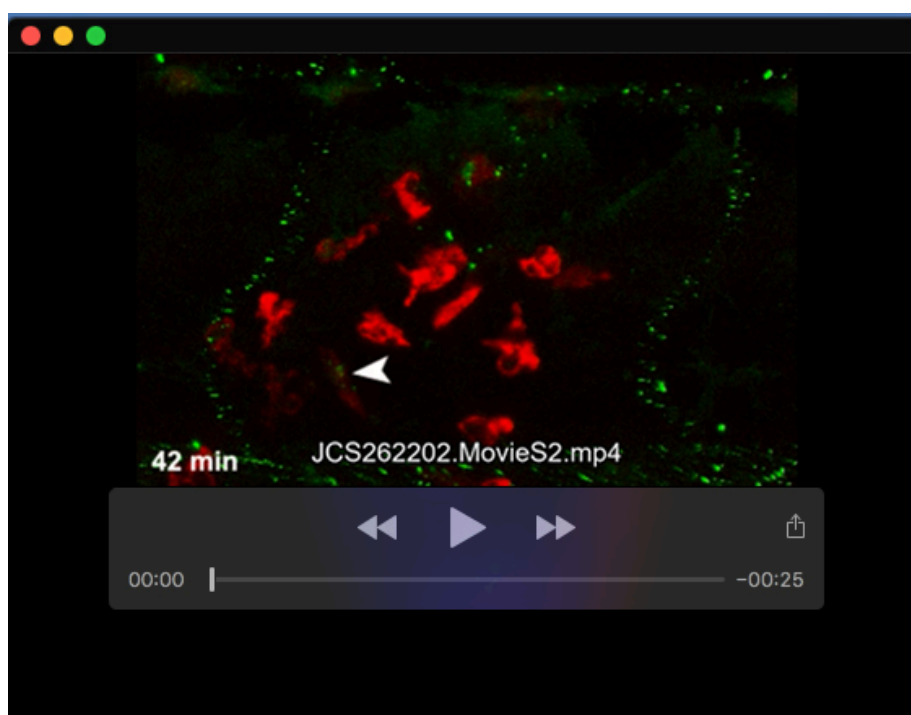

**Movie 2. Protocell-loaded macrophages migrating towards the wound site.** Time-lapse confocal movie in a different *Tg(mpeg1:mCherry)* larva showing multiple macrophages (red cells) with already internalized protocells (green dots, white arrowheads) prior to their migration towards the wound.

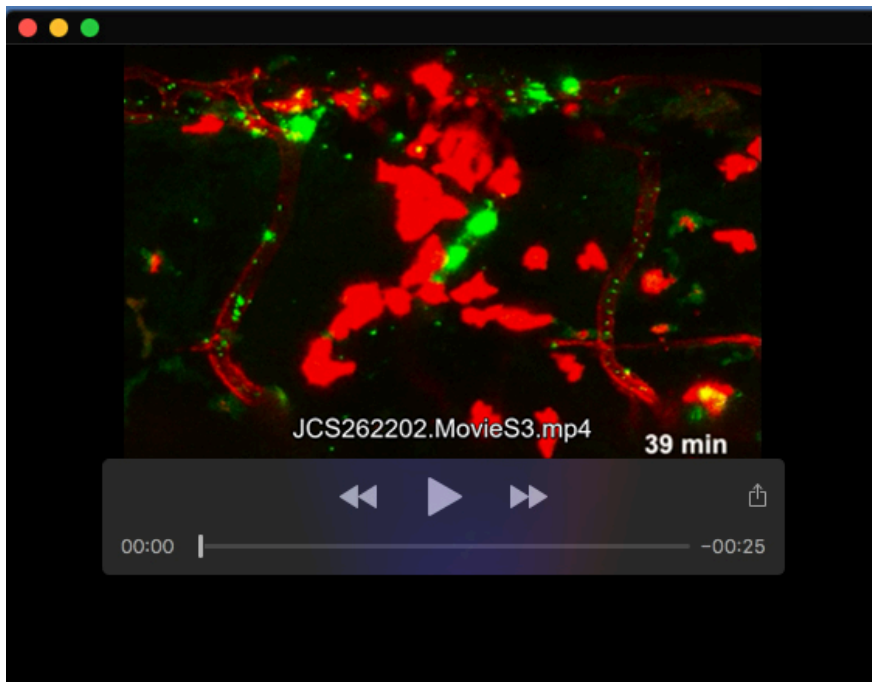

**Movie 3. Neutrophils effectively taking up protocells at the wound site.** Time-lapse confocal movie showing uptake of protocells (bright green dots) by wound-recruited neutrophils (bright red cells, white arrowheads) in a wounded *Tg(lyz:DsRed;mpeg1:FRET;kdrl:mCherry-CAAX)* larva at 0.5 hours post-wounding after systemic protocell injection. Note that this movie also shows how wound-recruited macrophages (dim green cells) can take up protocells at the wound site (cyan arrowhead) and how neutrophils, similarly to macrophages, already contain protocells prior to their recruitment to the wound (yellow arrowhead).

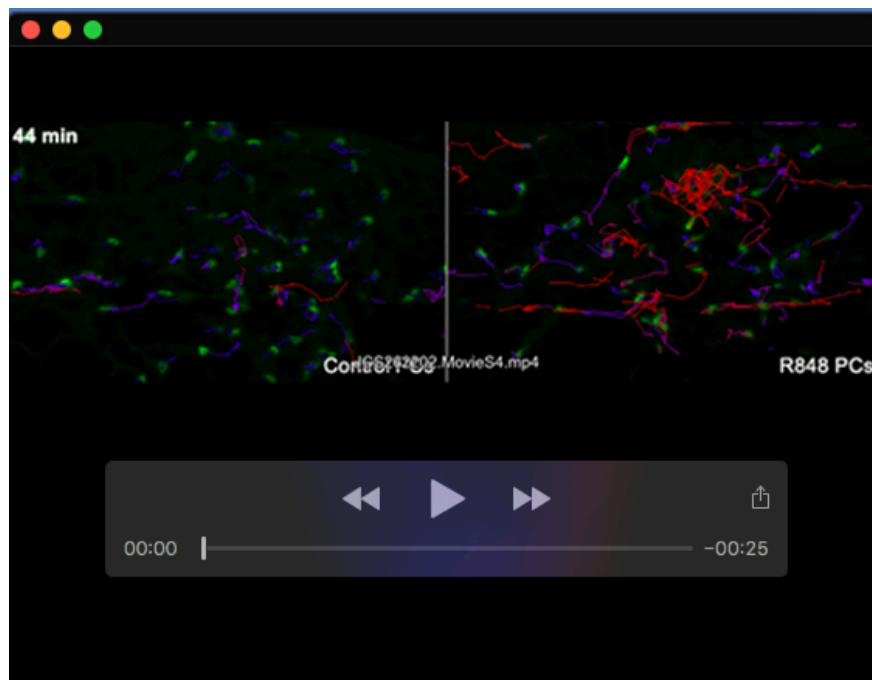

**Movie 4. R848-protocell treatment increases macrophage velocity at the wound site.** Time-lapse confocal movies showing tracks of macrophage nuclei (green) at the wound site in wounded *Tg(mpeg1:FRET)* larvae at 48 hours post-wounding after each protocell treatment. Note that warm and cold track colours indicate faster and slower macrophage velocity, respectively.

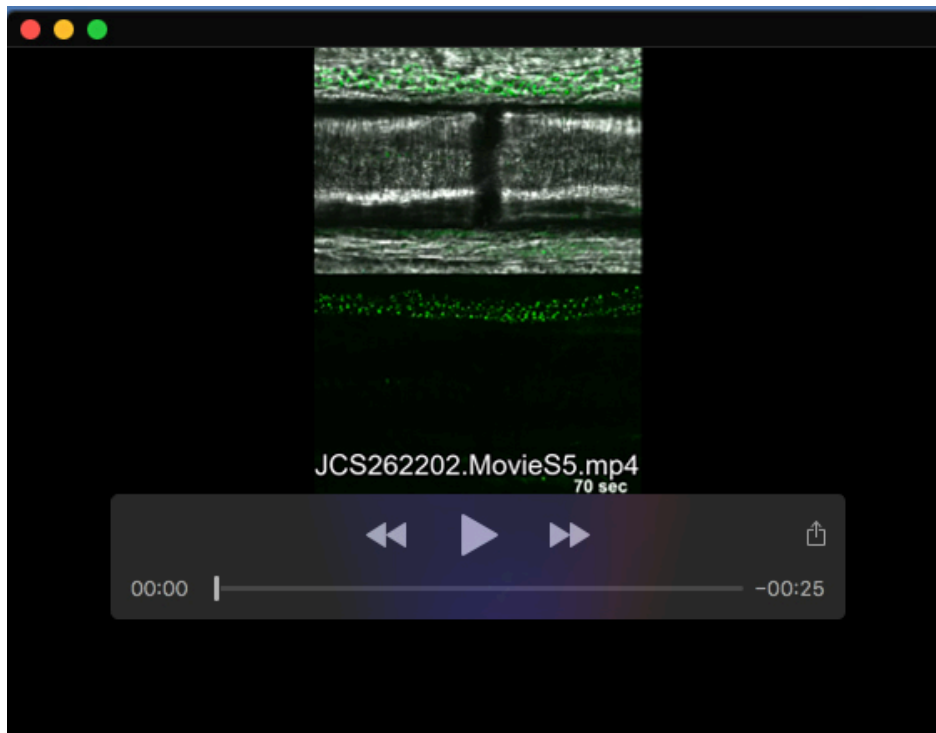

**Movie 5. Retro-orbital injection effectively delivers protocells to adult caudal fin vessels.** Time-lapse confocal movie showing free-circulating protocells (green dots) flowing through caudal fin vasculature in a WT adult fish at 1 hour after injection via retro-orbital administration.

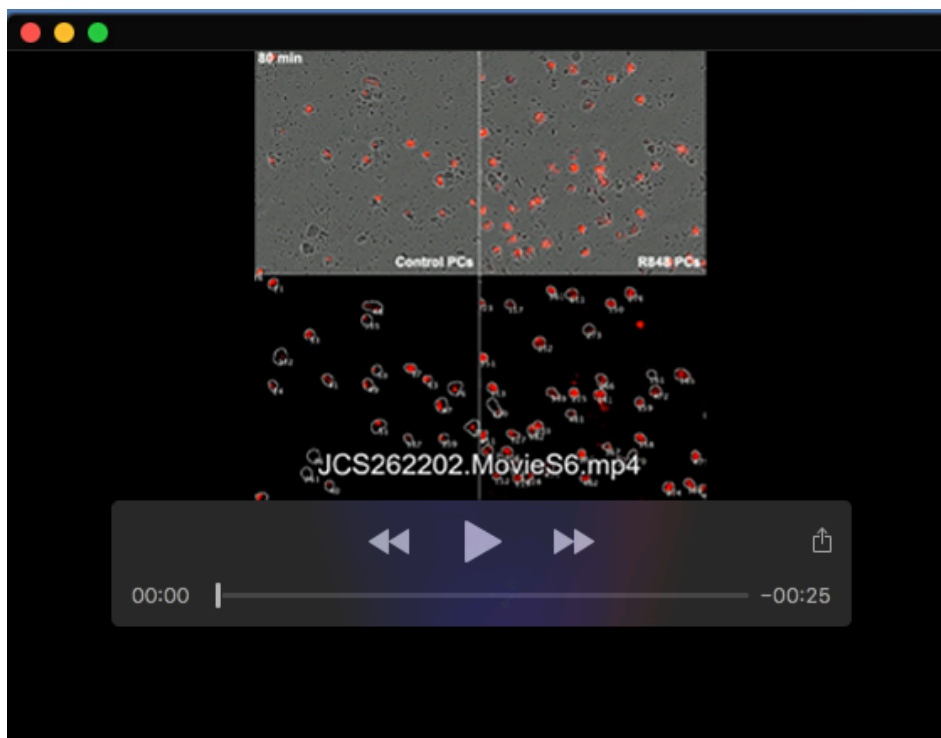

**Movie 6. R848-protocell treatment increases bacterial uptake by macrophages.** Time-lapse Incucyte movies of zoomed-in regions from wells containing cultured human macrophages incubated with bacterial bioparticles (red) after each protocell treatment. Note that white outlines indicate detected macrophages and white numbers indicate the order of appearance for detected macrophages.



## Supplementary References

- Gurevich, D. B., Severn, C. E., Twomey, C., Greenhough, A., Cash, J., Toye, A. M., Mellor, H. and Martin, P.** (2018). Live imaging of wound angiogenesis reveals macrophage orchestrated vessel sprouting and regression. *EMBO J.* **37**, e97786.doi:10.15252/embj.201797786.
- Shinriki, S., Jono, H., Ota, K., Ueda, M., Kudo, M., Ota, T., Oike, Y., Endo, M., Ibusuki, M., Hiraki, A., et al.** (2009). Humanized Anti-Interleukin-6 Receptor Antibody Suppresses Tumor Angiogenesis and In vivo Growth of Human Oral Squamous Cell Carcinoma. *Clin. Cancer Res.* **15**, 5426–5434.doi:10.1158/1078-0432.CCR-09-0287.
- Spandidos, A., Wang, X., Wang, H. and Seed, B.** (2010). PrimerBank: a resource of human and mouse PCR primer pairs for gene expression detection and quantification. *Nucleic Acids Res.* **38**, D792–D799.doi:10.1093/NAR/GKP1005.
